# Supplementary material for: A MAPK cascade couples maternal mRNA translation and degradation to meiotic cell cycle progression in mouse oocytes
Source: Oxford University Press journal article supplement (doi:10.1242/dev.144410), 2016-12-20
Supplement: dev144410supp.pdf [file dev144410supp.pdf]

**Supplementary Table 1. Antibody information.**

| <b>Protein name</b>                     | <b>Manufacture (catalogue number)</b>           | <b>Applications<br/>(working dilution)</b> |
|-----------------------------------------|-------------------------------------------------|--------------------------------------------|
| <b>FITC-<math>\alpha</math>-Tubulin</b> | Sigma (F2168)                                   | IF (1:500)                                 |
| <b>CNOT7</b>                            | Santa Cruz (sc-101009)                          | WB (1:200)                                 |
| <b>ERK1/2</b>                           | Santa Cruz (sc-94)                              | WB (1:1000)                                |
| <b>p-ERK1/2</b>                         | Cell Signaling (9101S)                          | IF (1:400)                                 |
| <b>HA</b>                               | Cell Signalling (3724)                          | WB (1:2000)                                |
| <b>FLAG</b>                             | Sigma (F3165)                                   | WB (1:3000)                                |
| <b>BTG4</b>                             | Abcam (ab206914)                                | WB (1:500)                                 |
| <b>CPEB1</b>                            | Proteintech(13274-1-AP)                         | WB (1:500)                                 |
| <b>TPX2</b>                             | Novus Biologicals(NB500-183)                    | WB (1:2000), IF (1:1000)                   |
| <b>CyclinB</b>                          | Cell Signaling (4138)                           | WB (1:500)                                 |
| <b>MYC</b>                              | Cell Signaling (2272)                           | WB (1:1000)                                |
| <b>CREST</b>                            | Fitzgerald Industries International (70R-21494) | IF (1:100)                                 |
| <b>TOP2B</b>                            | Abcam (ab109524)                                | IF (1:200)                                 |
| <b>DDB1</b>                             | Epitomics (3821-1)                              | WB (1:10000)                               |
| <b>WEE2</b>                             | Proteintech(55119-1-AP)                         | WB (1:500)                                 |

**Supplementary Table 2. Primer sequences.**

| Primer name      | Genes targeted  | Application                                  | Sequences (5'-3')                   |
|------------------|-----------------|----------------------------------------------|-------------------------------------|
| <i>Cre-1</i>     | <i>Gdf9-Cre</i> | Genotyping (420bp)                           | 5'-AAGAACCTGATGGACATGTTTCAG-3'      |
| <i>Cre-2</i>     |                 |                                              | 5'-CTGATTCTGGCAATTTCCGG-3'          |
| P1               | N.A.            | Anchor primer (C10T2) and PAT2 for PAT assay | 5'-CCCCCCCCCCTT-3'                  |
| P2               |                 |                                              | 5'-CAGGAAACAGCTATGACCCCCCCCCCCTT-3' |
| <i>Ccnb1-F</i>   | <i>Ccnb1</i>    | PAT assay (with P2)                          | 5'-CCACTCCTGTCTTGTAATGC-3'          |
| <i>Dazl-F</i>    | <i>Dazl</i>     | PAT assay (with P2)                          | 5'-GAGAAGGGAGAAAGAGACAAG-3'         |
| <i>Tex19.1-F</i> | <i>Tex19.1</i>  | PAT assay (with P2)                          | 5'-TCTGGCATGTTTCGTGTCAGTG-3'        |
| <i>Bub1b-F</i>   | <i>Bub1b</i>    | PAT assay (with P2)                          | 5'-CTGGTCTGGGGCTGCTGTGAT-3'         |
| <i>Tpx2-F</i>    | <i>Tpx2</i>     | PAT assay (with P2)                          | 5'-GGTGTGGCCTGGTTGGAGTAG-3'         |
| <i>Rps2-F</i>    | <i>Rps2</i>     | Real-time PCR (165bp)                        | 5'-GCCACCTTTGATGCCATCT-3'           |
| <i>Rps2-R</i>    |                 |                                              | 5'-TGTGGTAGCCACAGCTGGA-3'           |
| <i>Fgf8-F</i>    | <i>Fgf8</i>     | Real-time PCR (180bp)                        | 5'-CTTTTGGAAGCAGAGTCCGA-3'          |
| <i>Fgf8-R</i>    |                 |                                              | 5'-CCATGTACCAGCCCTCGTAC-3'          |
| <i>Zp2-F</i>     | <i>Zp2</i>      | Real-time PCR (161bp)                        | 5'-GCAGCTGGAGCTCTTGTTCT-3'          |
| <i>Zp2-R</i>     |                 |                                              | 5'-TCCATTGTCCAAAGTCCACA-3'          |
| <i>Tceb1-F</i>   | <i>Tceb1</i>    | Real-time PCR (176bp)                        | 5'-ATCTTCTGATGGCCATGAATTT-3'        |
| <i>Tceb1-R</i>   |                 |                                              | 5'-CCTTGTAGGTAAAATACATGCACAC-3'     |
| <i>Padi6-F</i>   | <i>Padi6</i>    | Real-time PCR (231bp)                        | 5'-AGTGTATCAGCCTGAACCGC-3'          |
| <i>Padi6-R</i>   |                 |                                              | 5'-AGGTGCCATTGATTTTGGG-3'           |

|                 |               |                       |                              |
|-----------------|---------------|-----------------------|------------------------------|
| <i>Nobox-F</i>  | <i>Nobox</i>  | Real-time PCR (153bp) | 5'-CATGAAGGGGACCTGAAGAA-3'   |
| <i>Nobox-R</i>  |               |                       | 5'-GGAAATCTCATGGCGTTTGT-3'   |
| <i>Paip2-F</i>  | <i>Paip2</i>  | Real-time PCR (200bp) | 5'-AGAGCGCCTATGTGTGGTGT-3'   |
| <i>Paip2-R</i>  |               |                       | 5'-TCTCCCACACAAGTCTTGCC-3'   |
| <i>Polr2d-F</i> | <i>Polr2d</i> | Real-time PCR (164bp) | 5'-AGTTTGAGTTGGCCTGTTTAGC-3' |
| <i>Polr2d-R</i> |               |                       | 5'-AGTGACGTCTGCGGATCAGT-3'   |
